# Supplementary material for: ADAR-mediated RNA editing suppresses sleep by acting as a brake on glutamatergic synaptic plasticity
Source: Nat Commun. 2016 Jan 27;7:10512. doi: 10.1038/ncomms10512 (PMC4737855; doi:10.1038/ncomms10512)
Supplement: Supplementary Information — Supplementary Figures 1-7 and Supplementary Table 1 [file ncomms10512-s1.pdf]

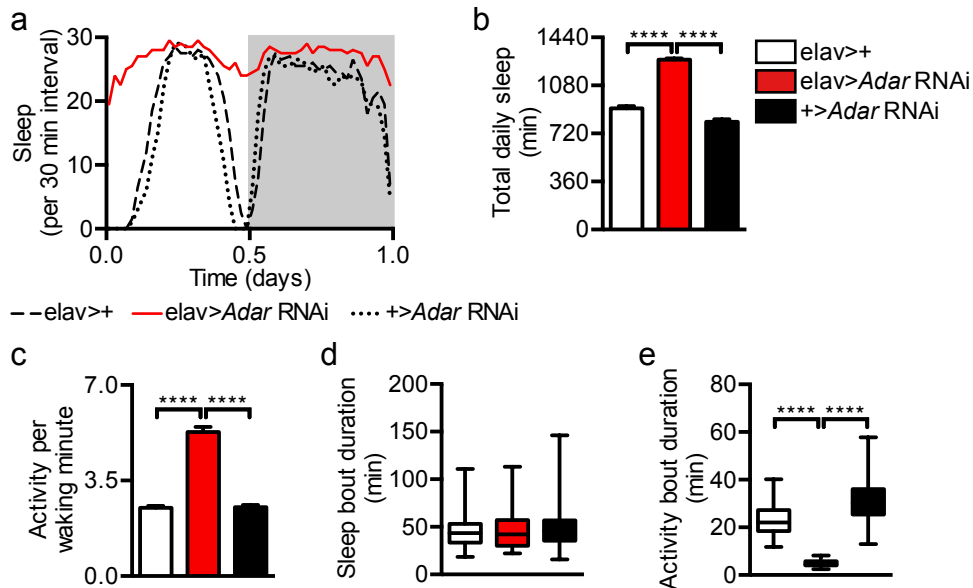

**Supplementary Figure 1. Reducing *Adar* expression in female flies increases sleep.**

(a) Representative sleep profiles of female *elav>Adar RNAi* and controls. (b) Quantification of sleep in (a). Pan-neuronal knockdown of *Adar* increases sleep in *elav>Adar RNAi* animals relative to controls. (c) Waking activity is not reduced in *elav>Adar RNAi* females. (d) Sleep maintenance is unaffected in *elav>Adar RNAi* females. (e) The wake state is destabilized in *elav>Adar RNAi* females relative to controls. For all panels, *elav>Adar RNAi* (n=37); *elav>+* (n=63); *+>Adar RNAi* (n=40).

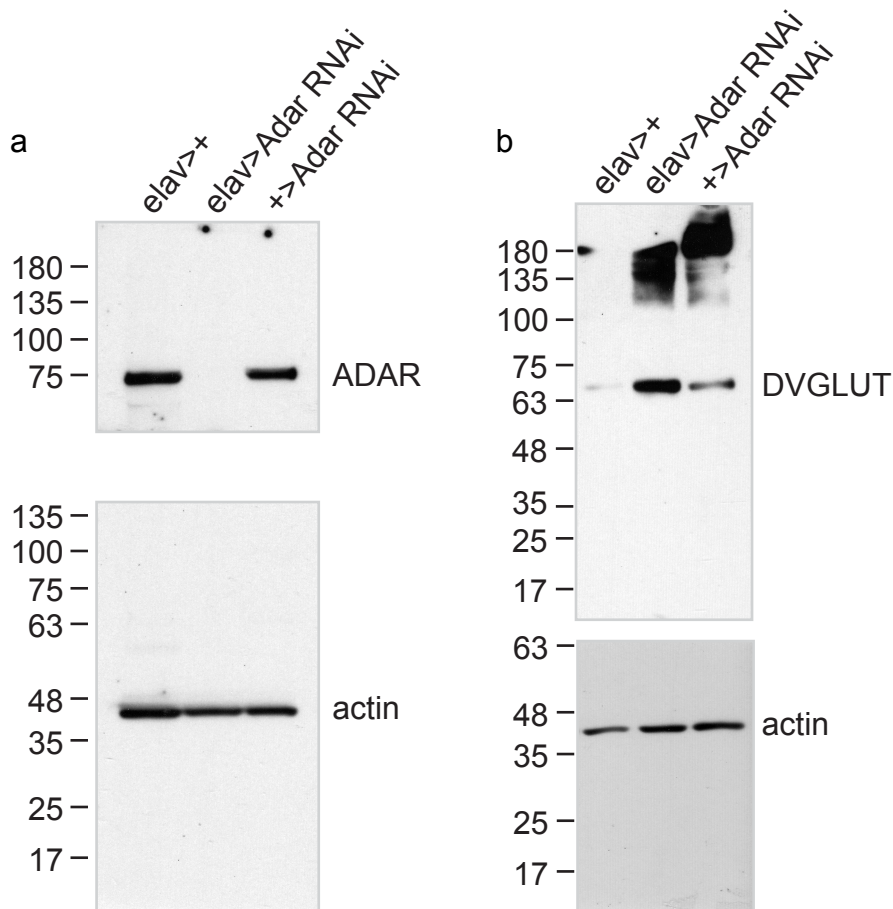

**Supplemental Figure 2. Full length Western blots of ADAR and DVGLUT from *Adar* knockdown and control flies.** (a) Efficient knockdown of ADAR expression is achieved in *elav>Adar* RNAi flies. (b) DVGLUT is elevated in *elav>Adar* RNAi relative to control animals.

a

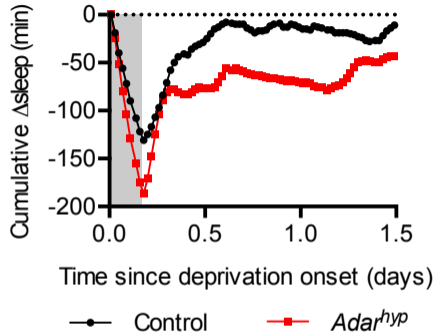

b

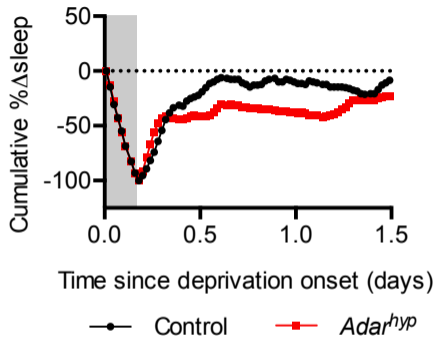

c

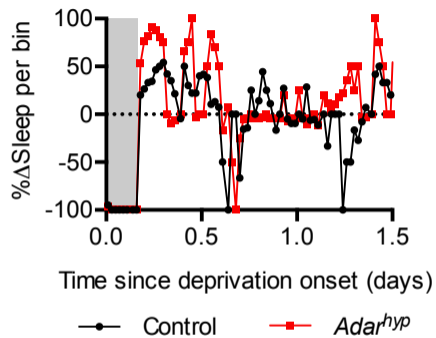

### Supplemental Figure 3. Rate of change in sleep during deprivation and recovery periods.

(a) Cumulative absolute and (b) cumulative relative changes in sleep show slower rate of recovery in *Adar<sup>hyp</sup>* relative to control animals. (c) Percent change in sleep per bin trends higher for *Adar<sup>hyp</sup>* than control animals. For all panels, the gray shaded region marks the sleep deprivation period.

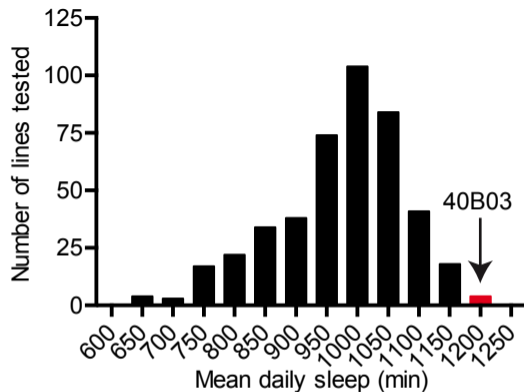

**Supplementary Figure 4. Enhancer-GAL4 screen for *Adar*-mediated sleep-regulating neurons.** Daily sleep was calculated for each Gal4>*Adar* RNAi combination and binned accordingly. The bin containing 40B03-Gal4 (arrow) is indicated in red.

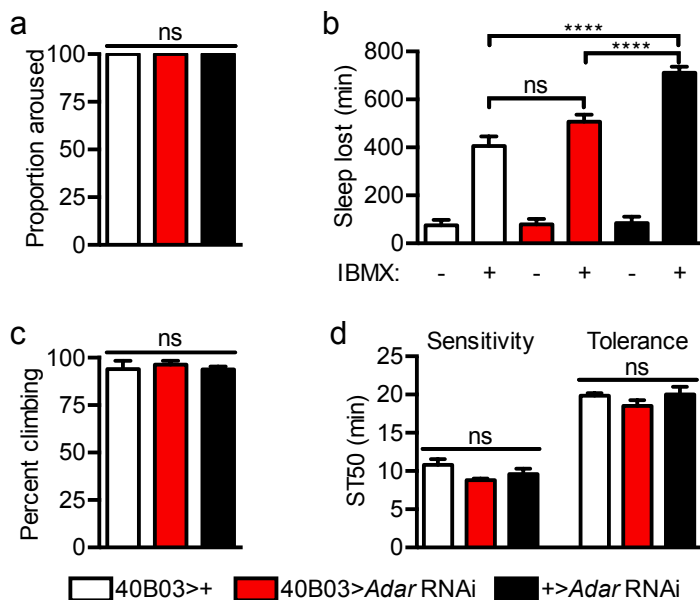

**Supplementary Figure 5. Behavioral changes in 40B03>Adar RNAi animals are attributable to increased sleep.** (a) Behavioral immobility in 40B03>Adar RNAi animals was acutely reversible by mechanical perturbation [n=3 trials per genotype; 8 animals were used for each trial]. (b) Behavioral immobility in 40B03>Adar RNAi animals was suppressible by the caffeine analog, IBMX [n=31 animals per genotype]. (c) Like controls, 40B03>Adar RNAi animals climbed 9.5 cm in 30 sec [n=3 trials of 10 flies per genotype]. (d) 40B03>Adar RNAi and control flies exhibited equivalent sensitivity and tolerance to ethanol [n=3 trials per genotype; 10 animals were used for each trial].

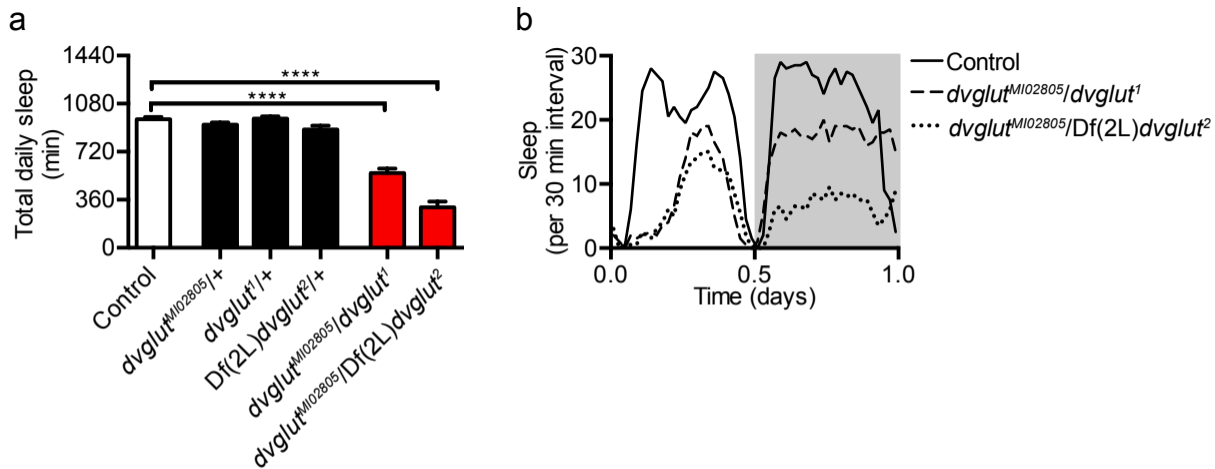

**Supplementary Figure 6. Severe reduction in *dvglut* suppresses sleep.** (a and b) Total daily sleep (a) and representative sleep profiles (b) of heteroallelic combinations of *dvglut* mutants and controls [n=22-31 for each genotype]. In this figure, control refers to animals harboring two copies of the wild-type *dvglut* allele.

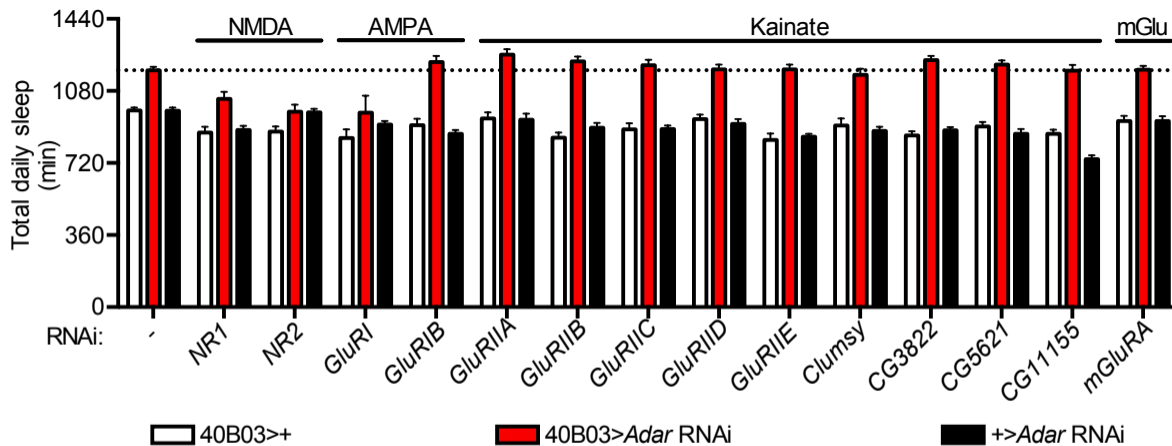

**Supplementary Figure 7. Knockdown of NMDA and AMPA receptors restores sleep to *Adar*-deficient animals.** Total daily sleep measured in control, 40B03>*Adar* RNAi, and 40B03>*Adar* RNAi in combination with RNAi's against ionotropic (NMDA, AMPA, kainate) and metabotropic (mGlu) glutamate receptors [n=7-31 for all genotypes].

| <b>Genotype</b>                    | <b>n</b> | <b>Total daily sleep mean (min)</b> | <b>Std. deviation</b> | <b>SEM</b> |
|------------------------------------|----------|-------------------------------------|-----------------------|------------|
| +> <i>Adar</i> RNAi                | 32       | 906                                 | 99                    | 17.5       |
| <i>elav</i> >+                     | 31       | 944                                 | 92                    | 16.5       |
| <i>elav</i> > <i>Adar</i> RNAi     | 28       | 1299                                | 61                    | 11.6       |
| <i>c522</i> >+                     | 31       | 1022                                | 103                   | 18.4       |
| <i>c522</i> > <i>Adar</i> RNAi     | 32       | 1000                                | 102                   | 18.1       |
| <i>104y</i> >+                     | 31       | 898                                 | 102                   | 18.4       |
| <i>104y</i> > <i>Adar</i> RNAi     | 32       | 789                                 | 120                   | 21.2       |
| <i>cha</i> >+                      | 32       | 971                                 | 118                   | 20.8       |
| <i>cha</i> > <i>Adar</i> RNAi      | 31       | 805                                 | 115                   | 20.7       |
| <i>sss</i> >+                      | 32       | 874                                 | 67                    | 11.9       |
| <i>sss</i> > <i>Adar</i> RNAi      | 32       | 893                                 | 107                   | 19.0       |
| <i>30y</i> >+                      | 31       | 859                                 | 102                   | 18.4       |
| <i>30y</i> > <i>Adar</i> RNAi      | 32       | 852                                 | 116                   | 20.6       |
| <i>TPH</i> >+                      | 32       | 932                                 | 79                    | 13.9       |
| <i>TPH</i> > <i>Adar</i> RNAi      | 32       | 954                                 | 108                   | 19.0       |
| <i>201y</i> >+                     | 24       | 1061                                | 78                    | 15.9       |
| <i>201y</i> > <i>Adar</i> RNAi     | 20       | 1046                                | 97                    | 21.8       |
| <i>Tdc2</i> >+                     | 32       | 983                                 | 98                    | 17.3       |
| <i>Tdc2</i> > <i>Adar</i> RNAi     | 31       | 918                                 | 107                   | 19.3       |
| <i>TH</i> >+                       | 32       | 1005                                | 88                    | 15.6       |
| <i>TH</i> > <i>Adar</i> RNAi       | 32       | 962                                 | 98                    | 17.3       |
| <i>OK371</i> >+                    | 30       | 939                                 | 139                   | 25.5       |
| <i>OK371</i> > <i>Adar</i> RNAi    | 32       | 814                                 | 130                   | 23.0       |
| <i>GAD</i> >+                      | 32       | 1028                                | 81                    | 14.2       |
| <i>GAD</i> > <i>Adar</i> RNAi      | 32       | 958                                 | 81                    | 14.3       |
| <i>Ddc</i> >+                      | 32       | 977                                 | 90                    | 15.8       |
| <i>Ddc</i> > <i>Adar</i> RNAi      | 29       | 874                                 | 94                    | 17.5       |
| <i>MB247</i> >+                    | 25       | 865                                 | 157                   | 31.4       |
| <i>MB247</i> > <i>Adar</i> RNAi    | 32       | 742                                 | 138                   | 24.4       |
| <i>tim</i> >+                      | 32       | 974                                 | 72                    | 12.6       |
| <i>tim</i> > <i>Adar</i> RNAi      | 25       | 925                                 | 116                   | 23.2       |
| <i>clk-4.1m</i> >+                 | 32       | 980                                 | 84                    | 14.8       |
| <i>clk-4.1m</i> > <i>Adar</i> RNAi | 28       | 876                                 | 112                   | 21.2       |
| <i>cry</i> >+                      | 15       | 963                                 | 90                    | 23.2       |
| <i>cry</i> > <i>Adar</i> RNAi      | 11       | 962                                 | 103                   | 30.9       |
| <i>24B</i> >+                      | 29       | 890                                 | 97                    | 18.1       |
| <i>24B</i> > <i>Adar</i> RNAi      | 29       | 778                                 | 125                   | 23.1       |
| <i>OK107</i> >+                    | 15       | 922                                 | 106                   | 27.2       |
| <i>OK107</i> > <i>Adar</i> RNAi    | 16       | 810                                 | 81                    | 20.3       |
| <i>npf</i> >+                      | 16       | 932                                 | 89                    | 22.2       |
| <i>npf</i> > <i>Adar</i> RNAi      | 16       | 770                                 | 123                   | 30.6       |
| <i>pdf</i> >+                      | 15       | 841                                 | 111                   | 28.7       |
| <i>pdf</i> > <i>Adar</i> RNAi      | 36       | 824                                 | 184                   | 30.6       |
| <i>vGlut</i> >+                    | 16       | 828                                 | 67                    | 16.8       |
| <i>vGlut</i> > <i>Adar</i> RNAi    | 16       | 806                                 | 79                    | 19.7       |
| <i>trh</i> >+                      | 16       | 750                                 | 122                   | 30.4       |
| <i>trh</i> > <i>Adar</i> RNAi      | 16       | 836                                 | 126                   | 31.5       |
| <i>ple</i> >+                      | 16       | 914                                 | 74                    | 18.5       |
| <i>ple</i> > <i>Adar</i> RNAi      | 16       | 897                                 | 97                    | 24.3       |

**Supplementary Table 1. Sleep effects of GAL4>*Adar* RNAi combinations using established, well-characterized drivers.** Total number of animals tested (n), total daily sleep, standard deviation, and standard error of the mean (SEM) are listed for the various GAL4 lines used to knock down *Adar*.
